# Supplementary material
Source: Royal Society of Chemistry journal article supplement (doi:10.1039/d5tb02868j)
Supplement: d5tb02868j1.pdf [file d5tb02868j1.pdf]

Supplementary information

**Polyethylene oxide-poloxamer 407 *in situ* forming gels: A dual-drug delivery system for periodontal application**

Ali Raza, Piarina Reginold, Nataša Škalko-Basnet, Sybil Obuobi\*

Drug Transport and Delivery Research Group, The Department of Pharmacy, UiT The Arctic University of Norway, Universitetsveien 57, 9037 Tromsø, Norway

\*corresponding author; sybil.obuobi@uit.no

**\*Corresponding author**

Dr. Sybil Obuobi,

Senior Researcher, Drug Transport and Delivery Research Group, The Department of Pharmacy, UiT The Arctic University of Tromsø, Norway.

E-mail: sybil.obuobi@uit.no

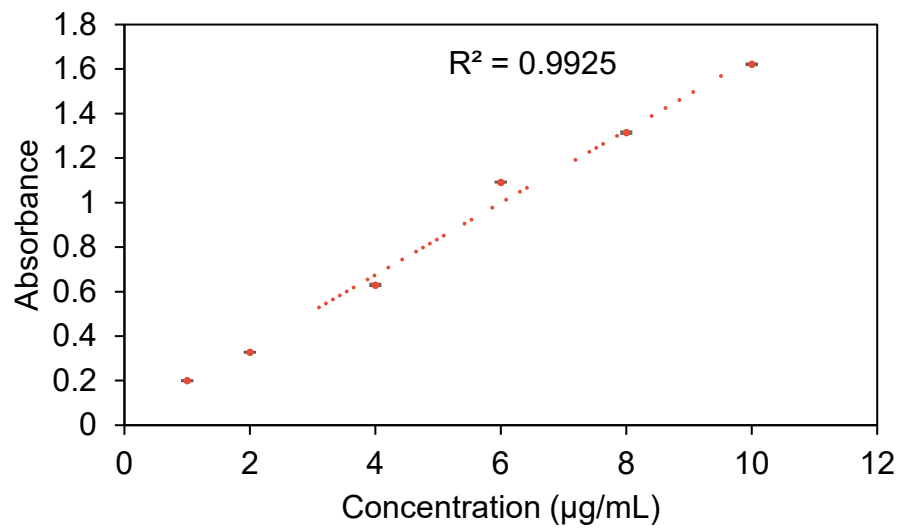

**Fig. S1.** Calibration curve of curcumin in 70 % v/v ethanol in water

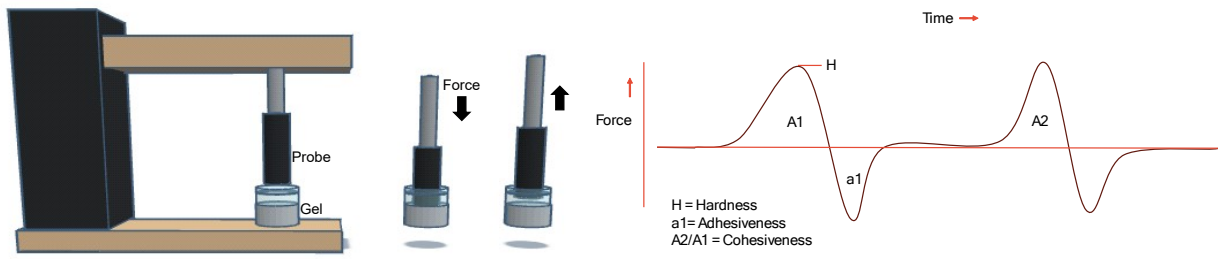

**Fig. S2.** Illustration of setup to evaluate hardness, cohesiveness, and adhesiveness of ISFG systems

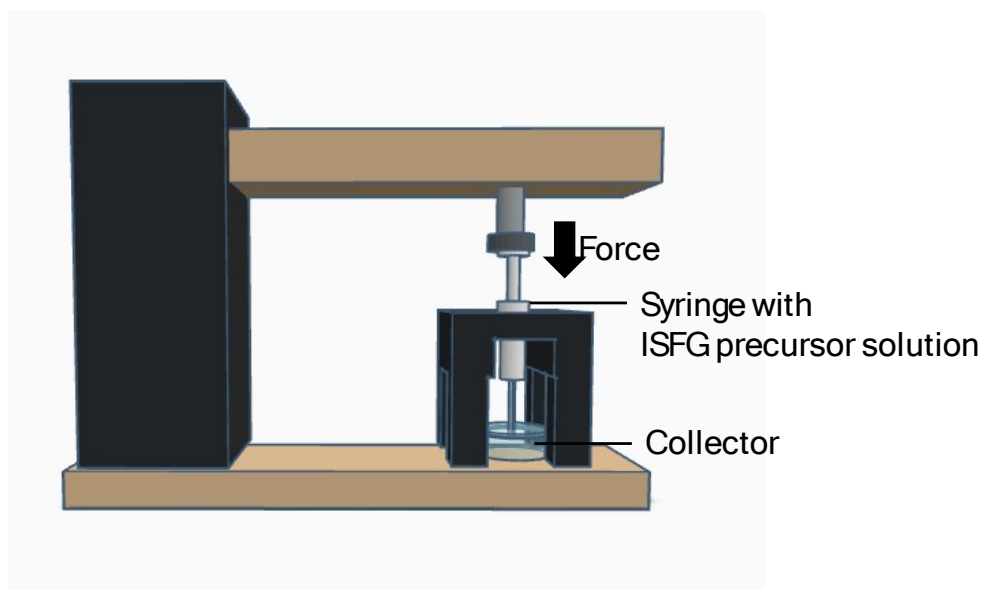

**Fig. S3.** Illustration to show setup for syringeability force determination

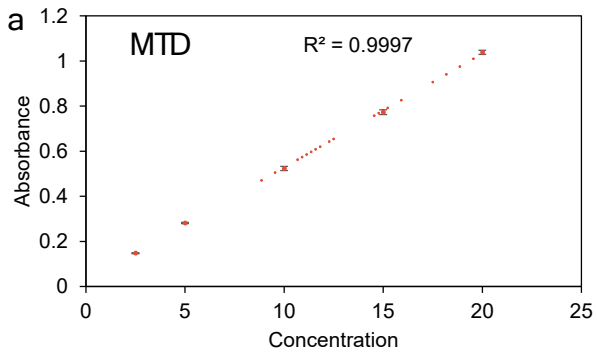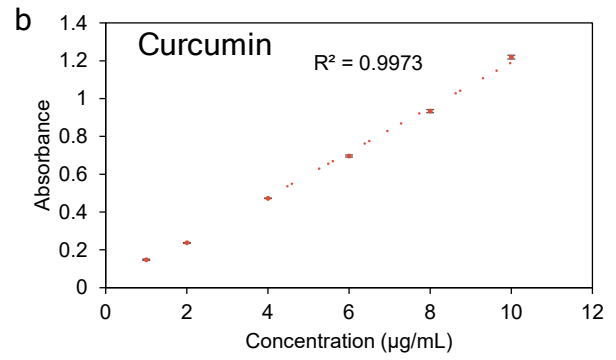

**Fig. S4.** Calibration curves for (a) metronidazole and (b) curcumin in dissolution medium

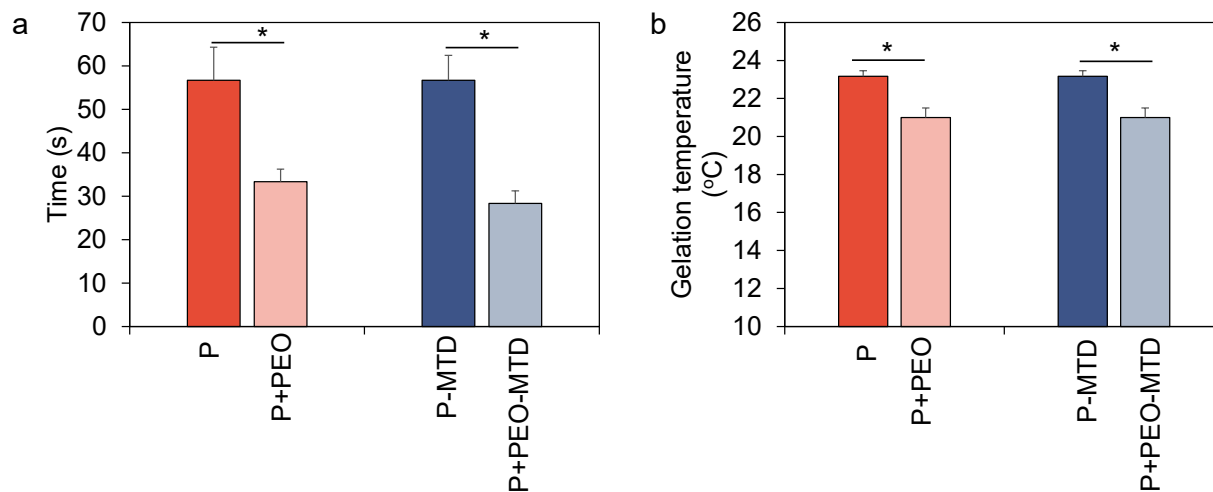

**Fig. S5.** Effect of PEO and MTD loading on gelation time and temperature. (a) Gelation time for ISFGs. (b) Gelation temperature for ISFGs.  $n = 3$ ,  $*p < 0.05$

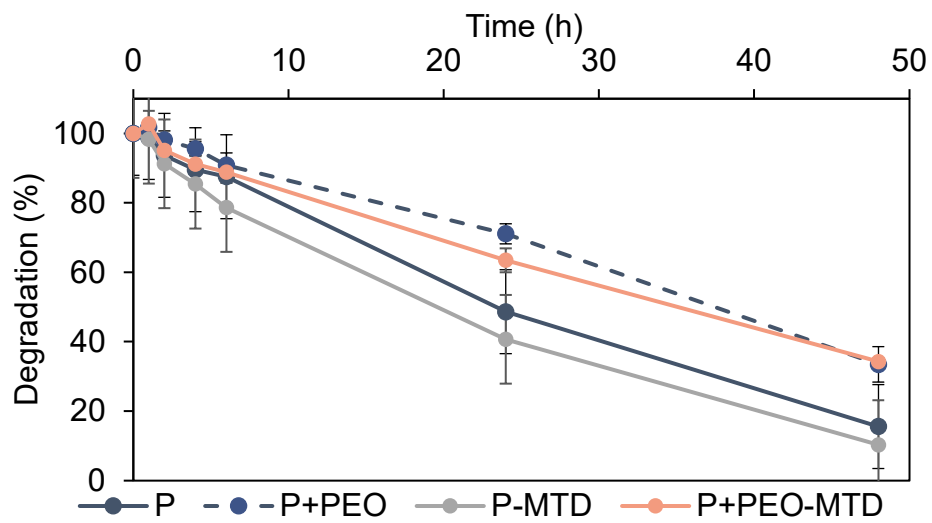

**Fig. S6.** Effect of PEO and MTD loading on the degradation of ISFGs

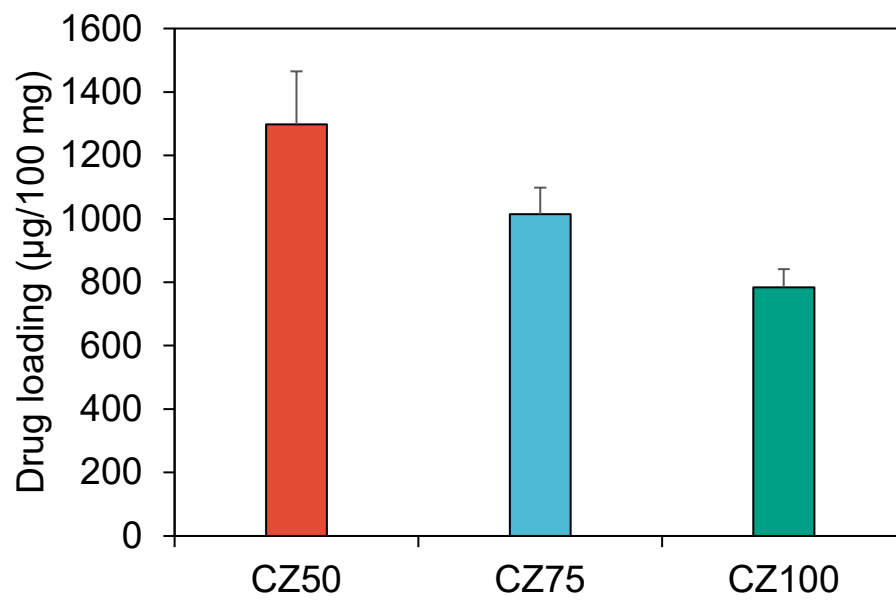

**Fig. S7.** Drug (curcumin) loading for three nanoparticle formulations

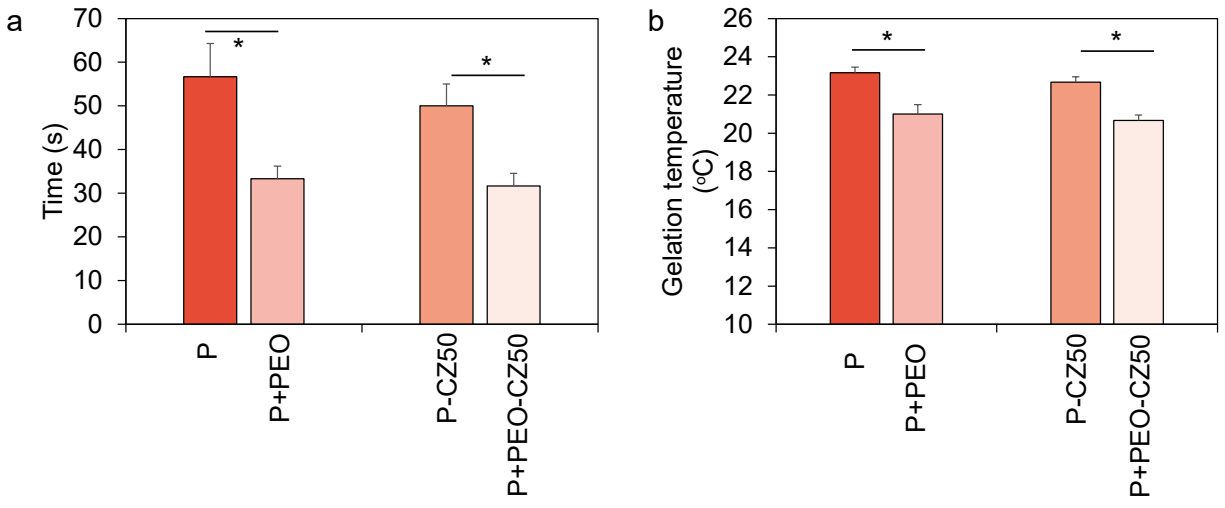

**Fig. 7.** Effect of PEO and nanoparticles loading on gelation time and temperature. (a) Gelation time for ISFGs. (b) Gelation temperature for ISFGs.  $n = 3$ ,  $*p < 0.05$

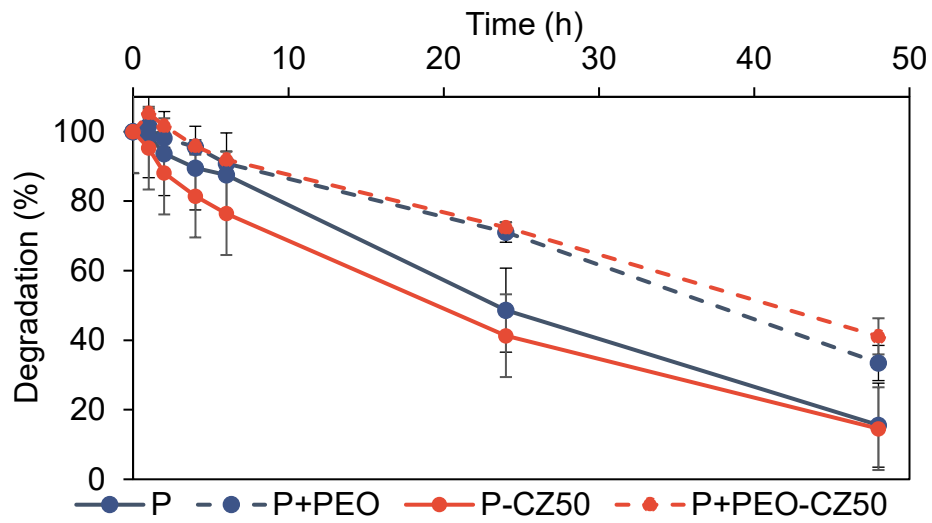

**Fig. 8.** Effect of PEO and nanoparticles loading on the degradation of ISFGs

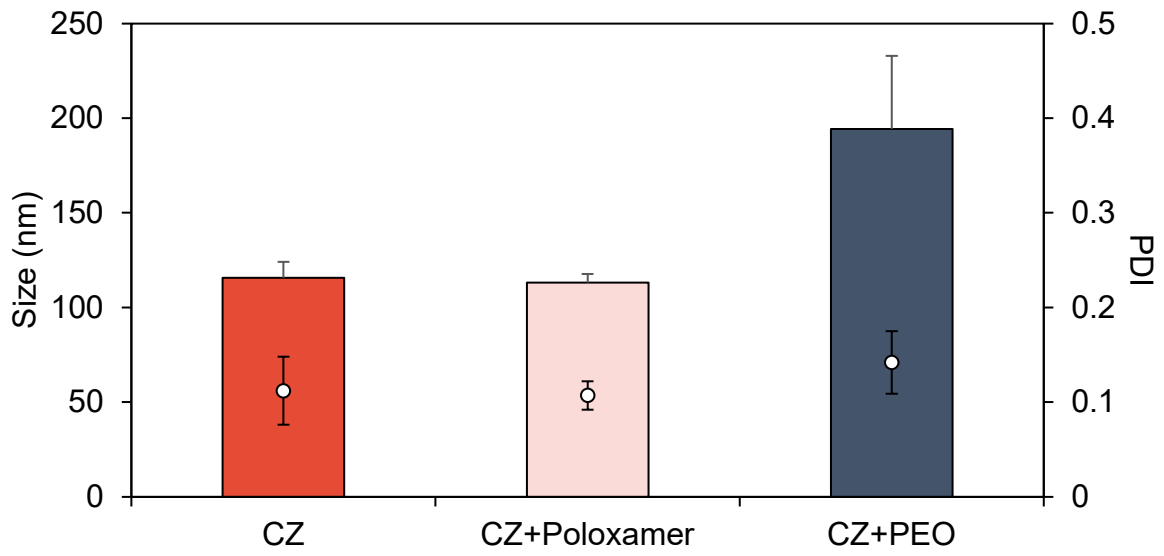

**Fig. S9.** Effect of the addition of PEO on nanoparticles' size

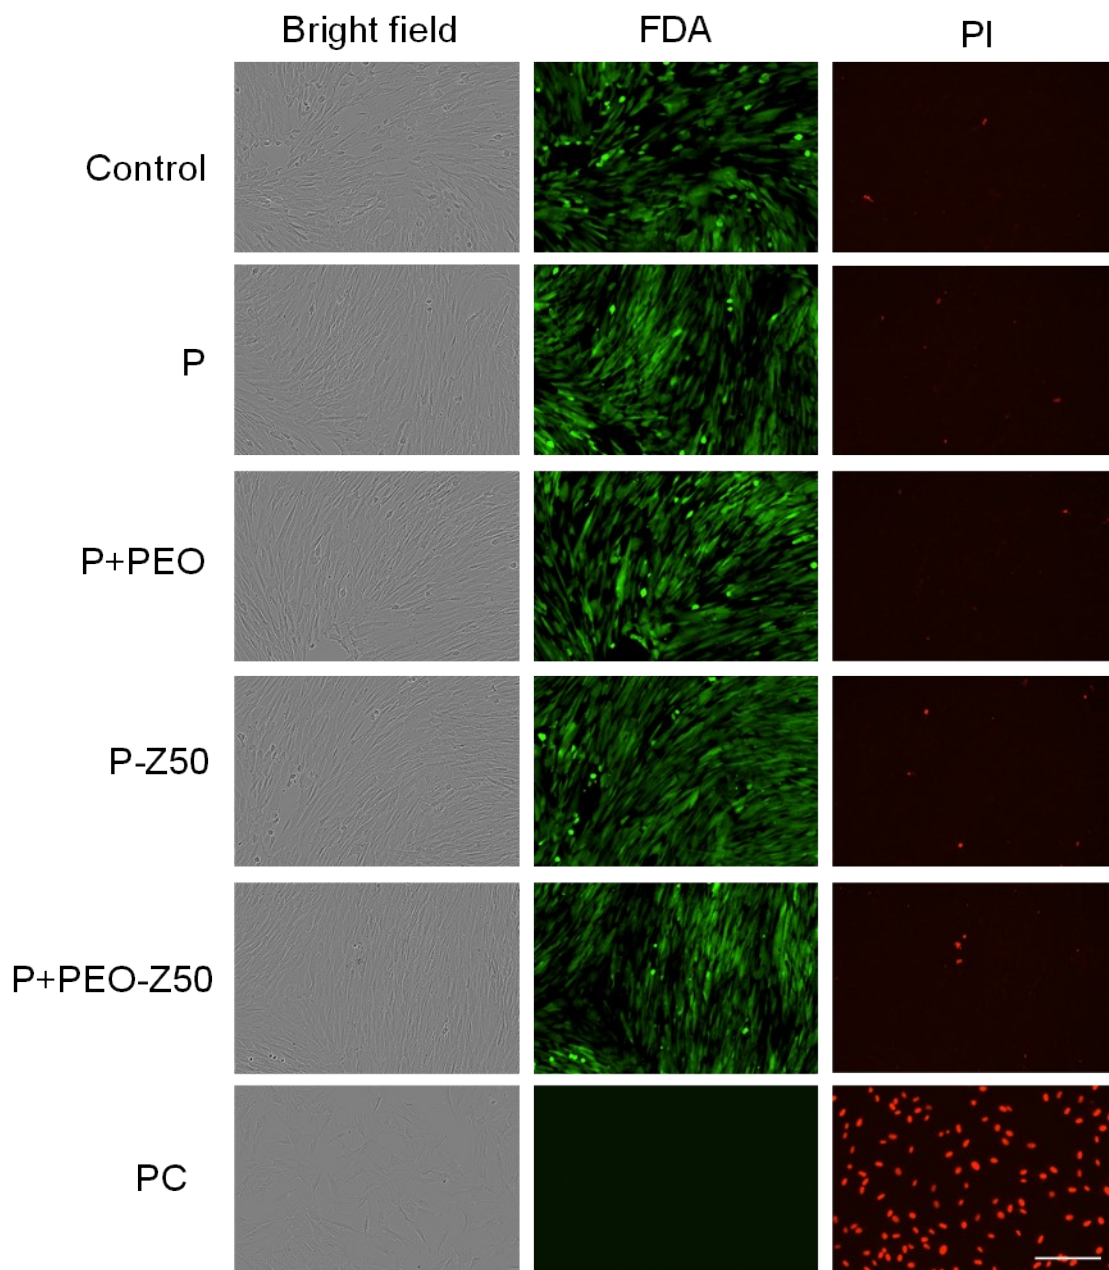

**Fig. S10.** Images of HDF cells after staining with FDA/PI stain for live/dead assay (treatment with 10 mg/mL ISFG extracts) (scale bar - 200 $\mu$ m)

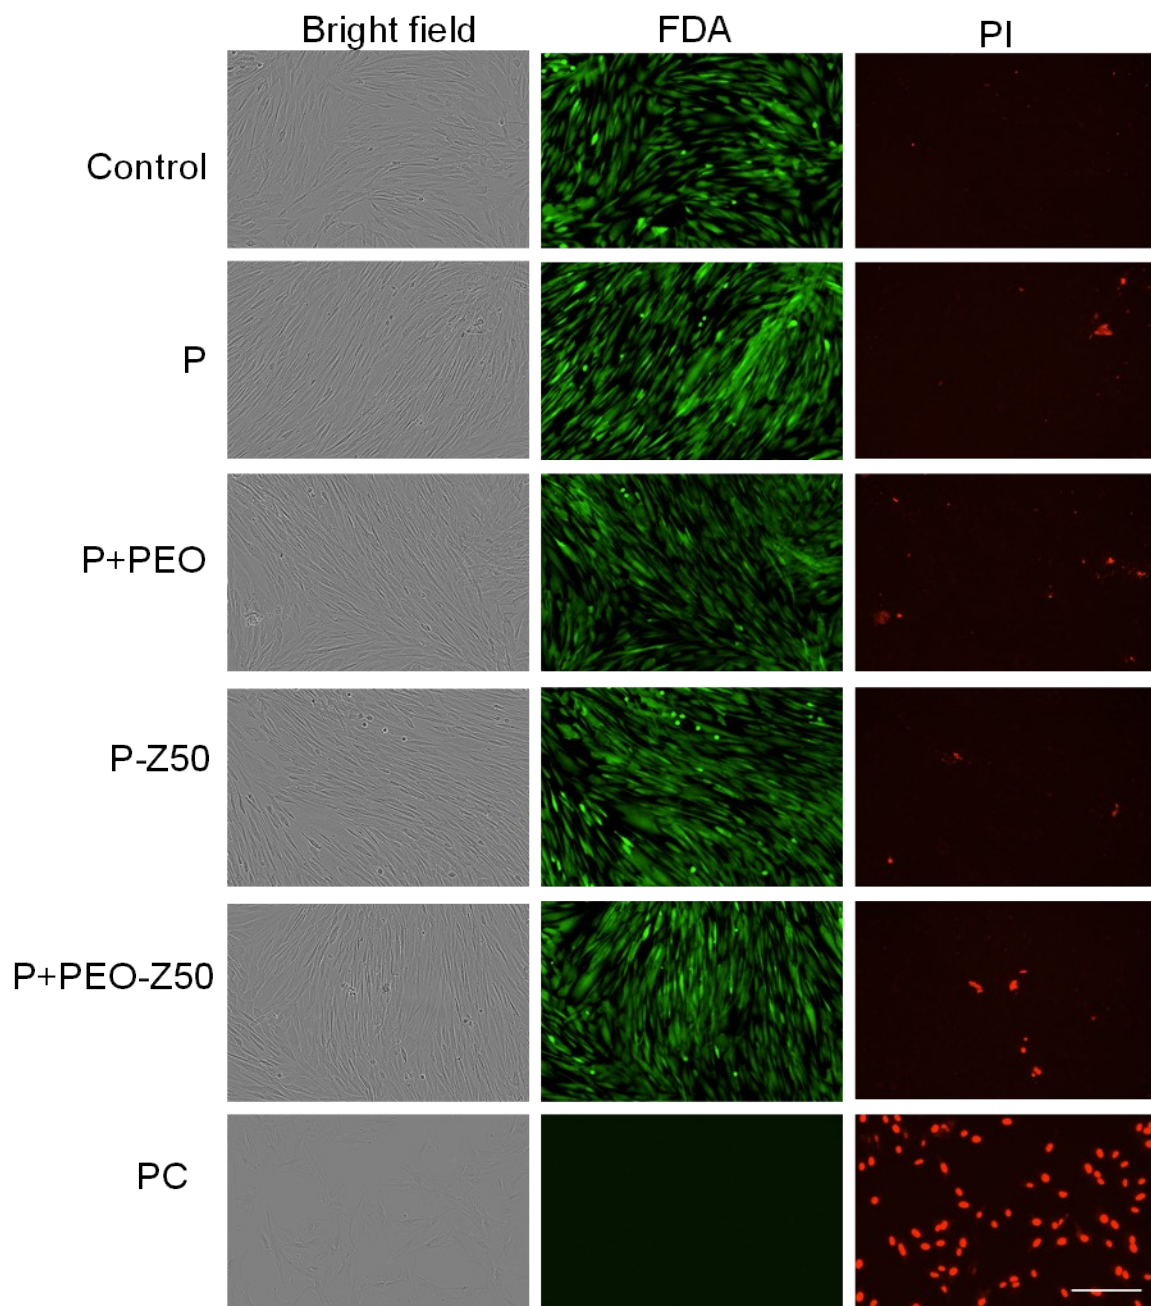

**Fig. S11.** Images of HDF cells after staining with FDA/PI stain for live/dead assay (treatment with 25 mg/mL ISFG extracts) (scale bar - 200 $\mu$ m)

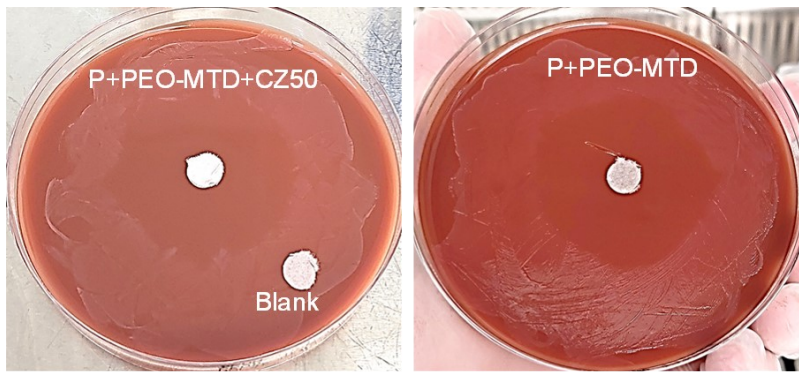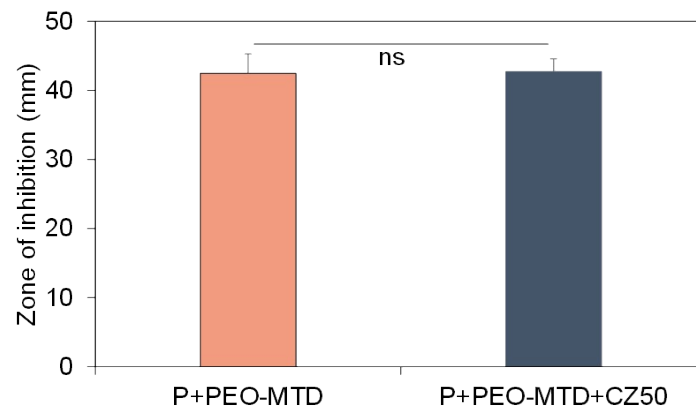

Fig. S12. Antibacterial activity of extracts of P+PEO-MTD and P+PEO-MTD+CZ50 using disc diffusion test (ns,  $p < 0.05$ )

Table S1. Kinetic model fitting for P-CZ50 and P+PEO-CZ50

| Formulation | Higuchi Model |            | Korsmeyer-Peppas Model |            |            |
|-------------|---------------|------------|------------------------|------------|------------|
|             | $k_H$         | $R^2$      | $k_{kp}$               | $R^2$      | n          |
| P-CZ50      | 13.702±1.87   | 0.444±0.31 | 23.663±9.32            | 0.976±0.02 | 0.584±0.16 |
| P+PEO-CZ50  | 15.184±4.96   | 0.959±0.04 | 17.242±9.39            | 0.982±0.02 | 0.549±0.08 |
